# Supplementary material
Source: publisher site journal article supplement (https://www.dovepress.com/article/392441)
Supplement: Supplementary file 1 [file get_supplementary_file.php]

# Supplementary Material

## Supplementary Material A: Search strategy

| **Database (Date)** | **Search Terms** | **Filters(s)** | **Result** |
| --- | --- | --- | --- |
| PubMed  (2021-10-07) | (Sleep OR Nap OR Asleep OR Wake OR Wakefulness OR Awake)  **AND** (Extended OR Episode OR Duration OR Restriction OR Restricted OR Loss OR Deprivation OR Efficiency OR Rest OR (Dose-Response) OR ((Prior OR Preceding OR History OR Habitual) AND (24 hours)))  **AND** (Motorway OR Driving OR Driver OR Automobile OR Car OR Truck OR (Road Traffic) OR (Motor Vehicle))  **AND** (Accident OR Crash OR Collision OR Incident OR Injury OR Fatality OR Safety OR Speeding OR Acceleration OR SDLP OR (Lateral Position) OR (Lane Position) OR (Lane Deviation)) | Include:  Full text,  English,  Humans,  Journal,  2000-2021  Exclude:  Reviews | 863 |
| Web of Science  (2021-10-07) | ALL=(Sleep OR Nap OR Asleep OR Wake OR Wakefulness OR Awake)  **AND** ALL=(Extended OR Episode OR Duration OR Restriction OR Restricted OR Loss OR Deprivation OR Efficiency OR Rest OR (Dose-Response) OR ((Prior OR Preceding OR History OR Habitual) AND (24 Hours)))  **AND** ALL=(Motorway OR Driving OR Driver OR Automobile OR Car OR Truck OR (Road Traffic) OR (Motor Vehicle))  **AND** ALL=(Accident OR Crash OR Collision OR Incident OR Injury OR Fatality OR Safety OR Speeding OR Acceleration OR SDLP OR (Lateral Position) OR (Lane Position) OR (Lane Deviation)) | Include:  English,  Journal Article,  2000-2021 | 1331 |
| Scopus  (2021-10-07) | TITLE-ABS-KEY (Sleep OR Nap OR Asleep OR Wake OR Wakefulness OR Awake)  **AND** TITLE-ABS-KEY (Extended OR Episode OR Duration OR Restriction OR Restricted OR Loss OR Deprivation OR Efficiency OR Rest OR (Dose-Response) OR ((Prior OR Preceding OR History OR Habitual) AND (24 Hours)))  **AND** TITLE-ABS-KEY (Motorway OR Driving OR Driver OR Car OR Truck OR Automobile OR (Road AND Traffic) OR (Motor AND Vehicle))  **AND** TITLE-ABS-KEY (Accident OR Crash OR Collision OR Incident OR Injury OR Fatality OR Safety OR Speeding OR Acceleration OR SDLP OR (Lateral AND Position) OR (Lane AND Position) OR (Lane AND Deviation)) | Include:  English,  Journal Article,  2000-2021 | 702 |
| Embase  (2021-10-07) | (Sleep or Nap or Asleep or Wake or Wakefulness or Awake).af.  **AND** (Sleep or Nap or Asleep or Wake or Wakefulness or Awake).af.  **AND** (Motorway or Driving or Driver or Car or Truck or Automobile or Road Traffic or Motor Vehicle).af.  **AND** (Accident or Crash or Collision or Incident or Injury or Fatality or Safety or Speeding or Acceleration or SDLP or Lateral Position or Lane Position or Lane Deviation).af. | Include:  English,  Human,  Article,  2000-2021 | 519 |

## Supplementary Material B: Methodological Details

### Selection Process

All records produced by the database searches were initially exported into Endnote (Version 20.2.1, Clarivate, Philadelphia), where duplicates were removed automatically, followed by manual checks to ensure that all duplicates were removed. The remaining unique records were uploaded to the PICO Portal (Version 1.0.2022.0124, PICO Portal, New York) online platform. All records then underwent screening for eligibility by two reviewers in two stages, based on the criteria. At the first stage, records were screened based on title and abstract. The PICO Portal system presented each abstract one at a time, using a machine-learning algorithm based on keywords to present relevant abstracts first. Each abstract was reviewed by two reviewers - one principal reviewer who screened all abstracts (AK), and one of three other reviewers who screened a subset each. At the second stage, records were screened based on the full text by the same reviewers. At each stage of dual review, both reviewers were required to agree to include or exclude the article. There was 92.5% agreement for abstracts and 84.6% agreement for full-text articles. Of the disagreements, 85.2% were resolved via discussion between the reviewers and a judicator facilitated the final decision for the remainder.

### Data collection process

Data were extracted from studies included in the review by three reviewers (AK, MS, ES). Each reviewer worked independently to extract relevant data from each study. Notes were made alongside each record where there were uncertainties about the methods, analyses, or results. Studies with any identified uncertainty were discussed between reviewers (including GR) to reach consensus.

### Data items

Data extracted from the studies included in this review comprised participant characteristics (e.g., number of participants, age, gender, key identifying demographics of the population), study design, sleep duration/TIB, and driving outcomes. Data have been collated based on study design (experimental or quasi-experimental, naturalistic, longitudinal, case-control, cross-sectional). Where possible, odds ratios were extracted and are included within the relevant data extraction tables. Data extraction tables are based on the Cochrane Consumers and Communication Review Group template 1.

### Synthesis methods

Studies were categorized based on design: (1) experimental / quasi-experimental studies, (2) naturalistic or longitudinal studies, (3) case-control studies, and (4) cross-sectional studies. Studies were synthesized based on design because in this context design reflected evidence types - with different levels of associated confidence in their findings. For example, while experimental studies allow us to directly compare prior sleep-wake behaviour (as this has been controlled), there may be limitations in real world applicability. Conversely, observational studies may have additional confounding factors, but likely reflect real-world driving performance.

### Data analysis

All studies included in the present systematic review were examined for relevant outcome data which would allow for inclusion in meta-analysis. Studies that presented sufficient odds ratio data or data which allowed for calculation of odds ratio and variance were considered for inclusion. Studies were included in the meta-analysis if they had sufficiently similar reference and outcome categories for sleep (i.e., all studies used six hours sleep vs less than six hours sleep) to allow accurate interpretation of results. To avoid attributing excess weight to studies only one relevant driving incident was included in analysis in order of severity (vehicle crash, falling asleep while driving, injury, or driving error).

Random effects Odds Ratio meta-analysis was conducted using the “meta” 2 and “dmetar” 3 packages in R 4 and R Studio 5 for pooled analysis where there was at least two comparable primary studies 6. Pre-calculated Odds Ratio effect sizes were extracted from primary studies, where possible adjusted Odds Ratio were used for analysis. Standard Error was calculated from confidence intervals using established guidelines 6. Studies which reported risk ratio were converted to odds ratio 6. Inverse variance method, with **Paule-Mandel** procedure was used due to the extraction of pre-calculated effect sizes7. Heterogeneity in studies was examined using I2 and Q statistics. Funnel plots were visually expected for asymmetry which may indicate the influence of publication bias 8. The potential of publication bias was also assessed through calculation of Eggers’ test 8. Publication bias is the phenomenon that studies with significant findings are more likely to be published and thus is an important consideration in meta-analysis 9.

Sensitivity analysis was conducted using leave-one-out analysis to asses if removal of any single study influenced the overall results 6. A prior sub-group analysis were planned for each specific driving outcome type (i.e. crash, injury, falling asleep, driving error) where at least two different subgroups were available 10, and mixed effect subgroup analysis was undertaken.

### Quality assessment

Joanna Briggs Institute (JBI) critical appraisal tools for randomised controlled trials, quasi-experimental studies, cross-sectional studies, and case control studies were used to examine the quality of studies included in this review 11,12. JBI tools include a series of criterion that are assessed for quality (e.g., appropriate study design, strength of statistical analyses, management of confounders, validity, reliability). For each criterion, studies are rated “Yes”, “No”, “Unclear”, and “Not Applicable”. These outcomes are used to produce an overall score for each study, which is indicative of study quality. Higher scores reflect better study quality and are also presented as a proportion of criterion which have been scored as ‘Yes’. Studies were categorised as being of low quality if they scored ≤40%, moderate quality if they scored >40 to ≤70%, and of high quality if they scored >70% 13. Assessments were performed by two reviewers. See Supplementary Material C for an overview of the criterion used to assess studies within each JBI tool.

## Supplementary Material C: JBI Criterion

### Criterion for Randomised Controlled Trials

| **#** | **Criterion** |
| --- | --- |
| 1 | Was true randomization used for assignment of participants to treatment groups? |
| 2 | Was allocation to treatment groups concealed? |
| 3 | Were treatment groups similar at the baseline? |
| 4 | Were participants blind to treatment assignment? |
| 5 | Were those delivering treatment blind to treatment assignment? |
| 6 | Were outcomes assessors blind to treatment assignment? |
| 7 | Were treatment groups treated identically other than the intervention of interest? |
| 8 | Was follow up complete and if not, were differences between groups in terms of their follow up adequately described and analyzed? |
| 9 | Were participants analyzed in the groups to which they were randomized? |
| 10 | Were outcomes measured in the same way for treatment groups? |
| 11 | Were outcomes measured in a reliable way? |
| 12 | Was appropriate statistical analysis used? |
| 13 | Was the trial design appropriate, and any deviations from the standard RCT design (individual randomization, parallel groups) accounted for in the conduct and analysis of the trial? |

### Criterion for Quasi-Experimental Studies

| **#** | **Criterion** |
| --- | --- |
| 1 | Is it clear in the study what is the ‘cause’ and what is the ‘effect’ (i.e., there is no confusion about which variable comes first)? |
| 2 | Were the participants included in any comparisons similar? |
| 3 | Were the participants included in any comparisons receiving similar treatment/care, other than the exposure or intervention of interest? |
| 4 | Was there a control group? |
| 5 | Were there multiple measurements of the outcome both pre and post the intervention/exposure? |
| 6 | Was follow up complete and if not, were differences between groups in terms of their follow up adequately described and analyzed? |
| 7 | Were the outcomes of participants included in any comparisons measured in the same way? |
| 8 | Were outcomes measured in a reliable way? |
| 9 | Was appropriate statistical analysis used? |

### Criterion for Case Control Studies

| **#** | **Criterion** |
| --- | --- |
| 1 | Were the groups comparable other than the presence of disease in cases or the absence of disease in controls? |
| 2 | Were cases and controls matched appropriately? |
| 3 | Were the same criteria used for identification of cases and controls? |
| 4 | Was exposure measured in a standard, valid and reliable way? |
| 5 | Was exposure measured in the same way for cases and controls? |
| 6 | Were confounding factors identified? |
| 7 | Were strategies to deal with confounding factors stated? |
| 8 | Were outcomes assessed in a standard, valid and reliable way for cases and controls? |
| 9 | Was the exposure period of interest long enough to be meaningful? |
| 10 | Was appropriate statistical analysis used? |

### Criterion for Analytical Cross-Sectional Studies

| **#** | **Criterion** |
| --- | --- |
| 1 | Were the criteria for inclusion in the sample clearly defined? |
| 2 | Were the study subjects and the setting described in detail? |
| 3 | Was the exposure measured in a valid and reliable way? |
| 4 | Were objective, standard criteria used for measurement of the condition? |
| 5 | Were confounding factors identified? |
| 6 | Were strategies to deal with confounding factors stated? |
| 7 | Were the outcomes measured in a valid and reliable way? |
| 8 | Was appropriate statistical analysis used? |

**Notes:**  Adapted from Joanna Briggs Institute.11,12

## Supplementary Material D: Publication bias


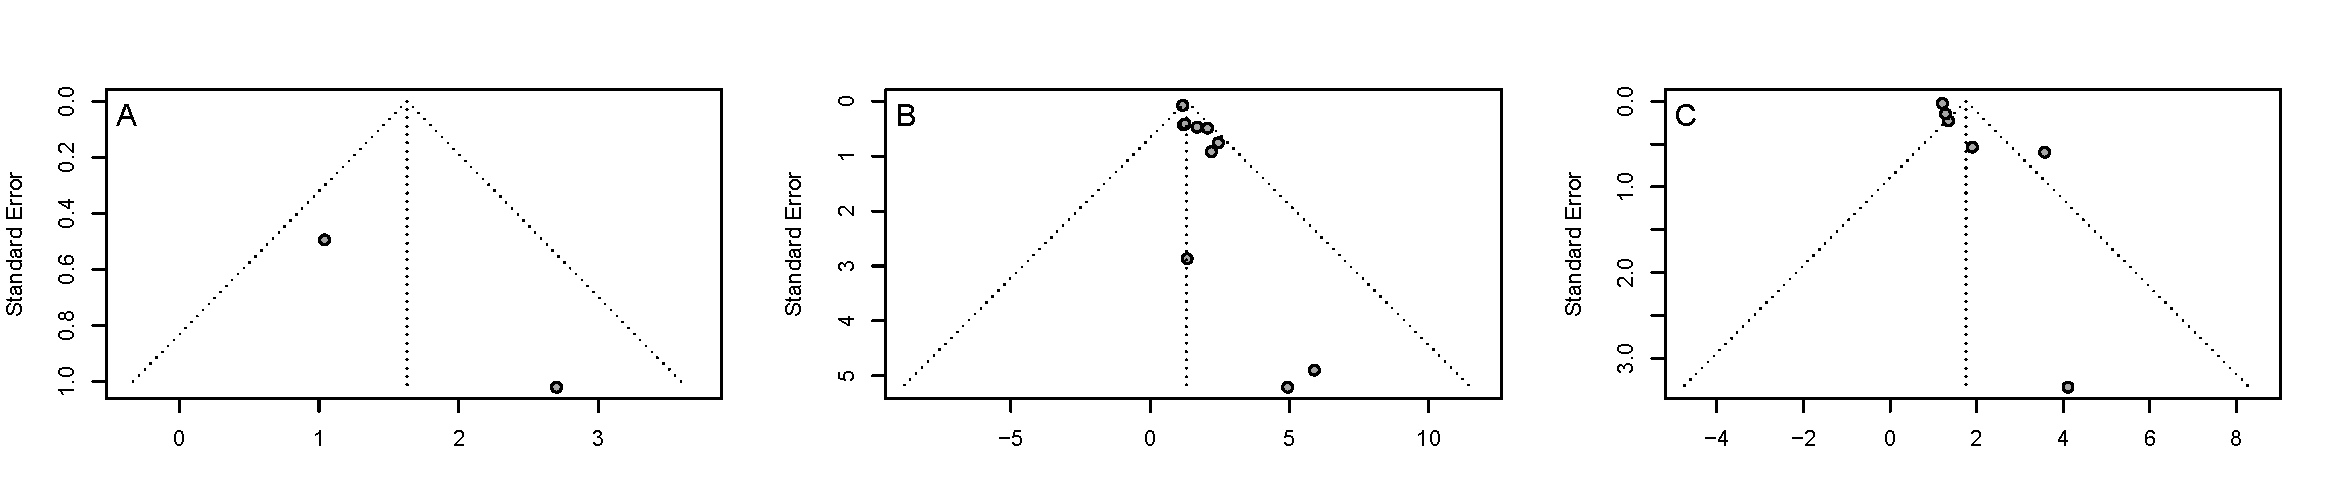


**Supplementary Figure 1.** Funnel plots for publication bias. Panel A: Five hours or more vs less than five hours, Panel B: Six hours or more vs less than six hours, Panel C: Seven hours or more vs less than seven hours.

## Supplementary Material E: Quality Assessment Outcomes

| **Supplementary Table 1**. Quality assessment of experimental studies (n = 10)* | | | | | | | | | | | | | | | |  | |
| --- | --- | --- | --- | --- | --- | --- | --- | --- | --- | --- | --- | --- | --- | --- | --- | --- | --- |
| **Author** | **Q1** | **Q2** | **Q3** | **Q4** | **Q5** | **Q6** | **Q7** | **Q8** | **Q9** | **Q10** | **Q11** | **Q12** | **Q13** | **JBI Score** | **%** | |
| Bartrim et al. (2020) 14 | Y | Y | Y | Y | Y | U | Y | Y | Y | Y | Y | U | Y | 11 | 85 | |
| Caponecchia & Williamson (2018) 15 | Y | Y | Y | N | U | U | Y | U | N | Y | Y | Y | Y | 8 | 62 | |
| Miyata et al. (2010) 16 | Y | U | Y | N | Y | U | Y | Y | Y | Y | Y | Y | Y | 10 | 77 | |
| Philip et al. (2005a) 17 | Y | U | Y | N | N | Y | Y | Y | Y | Y | Y | Y | Y | 10 | 77 | |
| Philip et al. (2005b) 18 | Y | U | Y | N | N | U | Y | Y | Y | Y | Y | Y | Y | 9 | 69 | |
| Shekari Soleimanloo et al. (2019) 19 | Y | U | Y | N | N | Y | Y | Y | Y | Y | Y | Y | Y | 10 | 77 | |
| Shiferaw et al. (2018) 20 | Y | U | Y | N | N | Y | Y | Y | Y | Y | Y | Y | Y | 10 | 77 | |
| Vakulin et al. (2007) 21 | Y | U | Y | N | N | Y | Y | Y | Y | Y | Y | Y | Y | 10 | 77 | |
| Wijayanto et al. (2021) 22 | Y | N | Y | N | N | U | N | Y | Y | Y | Y | Y | Y | 8 | 62 | |
| Zeller et al. (2020) 23 | Y | U | U | N | N | U | Y | Y | Y | Y | Y | Y | Y | 8 | 62 | |
| % of studies that met quality criteria for each question | 100 | 20 | 90 | 10 | 20 | 40 | 90 | 90 | 90 | 100 | 100 | 90 | 100 |  |  | |

* Note: the JBI tool for analysis of randomised controlled trials was used. Red = low quality, yellow = moderate quality, green = high quality.

| **Supplementary Table 2**. Quality assessment of quasi-experimental studies (n = 11)* | | | | | | | | | | | |  | |
| --- | --- | --- | --- | --- | --- | --- | --- | --- | --- | --- | --- | --- | --- |
| **Author** | **Q1** | **Q2** | **Q3** | **Q4** | **Q5** | **Q6** | **Q7** | **Q8** | **Q9** | **JBI Score** | **%** | |
| Akerstedt et al.(2010) 24 | Y | Y | Y | N | Y | Y | Y | Y | Y | 8 | 89 | |
| Anderson & Horne (2013) 25 | Y | Y | Y | N | N | Y | Y | Y | Y | 7 | 78 | |
| Barrett et al. (2004) 26 | Y | Y | Y | N | Y | U | Y | Y | Y | 7 | 78 | |
| Cai et al. (2021) 27 | Y | N | Y | Y | Y | Y | Y | Y | Y | 8 | 89 | |
| De Valck & Cluydts (2001) 28 | Y | Y | Y | N | N | Y | Y | Y | Y | 7 | 78 | |
| Filtness et al. (2012) 29 | Y | N | Y | Y | Y | U | Y | Y | Y | 7 | 78 | |
| Horne et al. (2003) 30 | Y | Y | Y | N | Y | Y | Y | Y | Y | 8 | 89 | |
| Jongen et al. (2015) 31 | Y | Y | Y | N | N | Y | Y | Y | Y | 7 | 78 | |
| Otmani et al. (2005) 32 | Y | Y | N | N | N | Y | Y | Y | Y | 6 | 67 | |
| Perrier et al. (2016) 33 | Y | Y | Y | N | N | Y | Y | Y | Y | 7 | 78 | |
| Pizza et al. (2004) 34 | Y | Y | Y | N | Y | Y | Y | Y | Y | 8 | 89 | |
| % of studies that met quality criteria for each question | 100 | 82 | 91 | 18 | 55 | 82 | 100 | 100 | 100 |  |  | |

* Note: the JBI tool for analysis of quasi-experimental studies was used. Red = low quality, yellow = moderate quality, green = high quality.

| **Supplementary Table 3.** Quality assessment of naturalistic and longitudinal studies* (n=4) | | | | | | | | | |  |
| --- | --- | --- | --- | --- | --- | --- | --- | --- | --- | --- |
| **Author** | **Q1** | **Q2** | **Q3** | **Q4** | **Q5** | **Q6** | **Q7** | **Q8** | **JBI Score** | **%** |
| Hanowski et al. (2007) 35 | Y | Y | Y | N/A | N | N | U | Y | 4 | 50 |
| Liu et al. (2019) 36 | Y | N | N | N/A | N | N | Y | Y | 3 | 38 |
| Martiniuk et al. (2013) 37 | Y | Y | Y | N/A | Y | Y | Y | Y | 7 | 88 |
| Smith et al. (2021) 38 | Y | Y | N | N/A | N | N | Y | Y | 4 | 50 |
| % of studies that met quality criteria for each question | 100 | 75 | 50 | 0 | 25 | 25 | 75 | 100 |  |  |

* Note: the JBI tool for analysis of cross-sectional studies was used. Red = low quality, yellow = moderate quality, green = high quality.

| **Supplementary Table 4**. Quality assessment of case-control studies (n = 11)* | | | | | | | | | | | | |  |
| --- | --- | --- | --- | --- | --- | --- | --- | --- | --- | --- | --- | --- | --- |
| **Author** | **Q1** | **Q2** | **Q3** | **Q4** | **Q5** | **Q6** | **Q7** | **Q8** | **Q9** | **Q10** | **JBI Score** | **%** | |
| Cummings et al. (2001) 39 | Y | Y | N | Y | Y | Y | Y | Y | Y | Y | 9 | 90 | |
| Connor et al. (2002) 40 | N | Y | N | Y | N | Y | Y | Y | Y | Y | 7 | 70 | |
| Stutts et al. (2003) 41 | Y | Y | N | Y | N | Y | Y | Y | Y | Y | 8 | 80 | |
| Dorrian et al. (2011) 42 | U | Y | Y | Y | Y | N | N | Y | Y | Y | 7 | 70 | |
| Bakiri et al. (2013) 43 | Y | Y | Y | Y | Y | Y | Y | Y | Y | Y | 10 | 100 | |
| Galéra et al. (2012) 44 | Y | Y | Y | Y | Y | Y | Y | Y | Y | Y | 10 | 100 | |
| Stevenson et al. (2014) 45 | Y | Y | N | N | N | Y | U | Y | Y | Y | 6 | 60 | |
| Herman et al. (2014) 46 | Y | Y | N | Y | Y | Y | Y | Y | Y | Y | 9 | 90 | |
| Philip et al. (2014) 47 | Y | Y | N | Y | N | Y | Y | Y | Y | Y | 8 | 80 | |
| Tefft (2018) 48 | N | Y | Y | Y | Y | Y | Y | Y | Y | Y | 9 | 90 | |
| Kalsi et al. (2018) 49 | N | Y | Y | U | Y | Y | Y | Y | Y | Y | 8 | 80 | |
| % of studies that met quality criteria for each question | 64 | 100 | 45 | 82 | 64 | 91 | 82 | 100 | 100 | 100 |  |  | |

* Note: the JBI tool for analysis of case-control studies was used. Red = low quality, yellow = moderate quality, green = high quality.

| **Supplementary Table 5.** Quality assessment of cross-sectional studies (n=25)* | | | | | | | | | | |  | |
| --- | --- | --- | --- | --- | --- | --- | --- | --- | --- | --- | --- | --- |
| **Author** | **Q1** | **Q2** | **Q3** | **Q4** | **Q5** | **Q6** | **Q7** | **Q8** | **JBI Score** | **%** | |
| Abe et al. (2012) 50 | Y | Y | N | N/A | Y | Y | Y | Y | 6 | 75 | |
| Abe et al. (2010) 51 | Y | Y | N | Y | Y | Y | Y | Y | 7 | 88 | |
| Abe et al. (2011) 52 | Y | Y | N | N | Y | Y | N | Y | 5 | 63 | |
| AlShareef et al. (2021) 53 | N | Y | Y | N | Y | Y | Y | Y | 6 | 75 | |
| Andreassen (2018) 54 | Y | Y | Y | N/A | Y | Y | N | Y | 6 | 75 | |
| Center for Disease Control and Prevention (2011) 55 | Y | Y | N | N/A | Y | N | N | Y | 4 | 50 | |
| Center for Disease Control and Prevention (2013) 56 | Y | Y | N | N/A | Y | N | N | Y | 4 | 50 | |
| Chen et al. (2010) 57 | Y | Y | Y | N/A | Y | Y | N | Y | 6 | 75 | |
| Di Milia et al. (2012) 58 | Y | Y | Y | N/A | Y | Y | N | Y | 6 | 75 | |
| Elliman et al. (2020) 59 | Y | Y | Y | Y | Y | Y | Y | Y | 8 | 100 | |
| Hutchens et al. (2008) 60 | Y | Y | Y | N/A | Y | Y | N | Y | 6 | 75 | |
| Ikeda et al. (2021) 61 | Y | Y | Y | Y | Y | Y | Y | Y | 8 | 100 | |
| Johnson et al. (2017) 62 | Y | Y | N | Y | Y | Y | N | Y | 6 | 75 | |
| Kim et al. (2018) 63 | N | Y | Y | N/A | Y | Y | Y | Y | 6 | 75 | |
| Lemke et al. (2016) 64 | Y | Y | N | N/A | N | N | N | Y | 3 | 38 | |
| Mahajan et al. (2019a) 65 | N | Y | N | N/A | Y | N | Y | Y | 4 | 50 | |
| Mahajan et al. (2019b) 66 | Y | Y | N | N/A | Y | Y | N | Y | 5 | 63 | |
| Maia et al. (2013) 67 | Y | Y | N | N | N | N | N | Y | 3 | 38 | |
| Morrow et al. (2004) 68 | Y | Y | N | N/A | N | N | N | Y | 3 | 38 | |
| Ohayon et al. (2010) 69 | Y | Y | Y | N/A | N | N | Y | Y | 5 | 63 | |
| Perttula et al. (2011) 70 | Y | Y | N | N/A | Y | N | N | Y | 4 | 50 | |
| Quera Salva et al. (2014) 71 | Y | Y | N | N/A | Y | Y | Y | Y | 6 | 75 | |
| Radun et al. (2004) 72 | Y | Y | Y | N | Y | Y | U | Y | 6 | 75 | |
| Watling et al. (2020) 73 | Y | Y | Y | Y | Y | Y | Y | Y | 8 | 100 | |
| Wu et al. (2020) 74 | Y | Y | Y | N/A | Y | Y | N | Y | 6 | 75 | |
| % of studies that met quality criteria for each question | 88 | 100 | 48 | 20 | 84 | 68 | 40 | 100 |  |  | |

* Note: the JBI tool for analysis of cross-sectional studies was used. Red = low quality, yellow = moderate quality, green = high quality.

## Supplementary Materials References

1. Consumers C, Ryan R, Synnot A, Hill S. Data extraction template. 2018;

2. *How to perform a meta-analysis with R: a practical tutorial.* Evidence-Based Mental Health; 2019.

3. *dmetar: Companion R Package For The Guide 'Doing Meta-Analysis in R'. R package version 0.0.9000*. 2019. <http://dmetar.protectlab.org/>

4.  *A language and environment for statistical computing. R Foundation for Statistical Computing*. Version 3.6.2. 2021.

5. *RStudio: Integrated Development Environment for R*. Version 1.2.5033. 2021.

6. Higgins J, Thomas J, Chandler J, Cumpston M, Li T Page M, Welch VA e. Cochrane Handbook for Systematic Reviews of Interventions version 6.1 (updated September 2020). 2020;

7. Jackson D, Veroniki AA, Law M, Tricco AC, Baker R. Paule-Mandel estimators for network meta-analysis with random inconsistency effects. *Research Synthesis Methods*. 2017;8(4):416-434. doi:10.1002/jrsm.1244

8. Egger M, Smith GD, Schneider M, Minder C. Bias in meta-analysis detected by a simple, graphical test. *Bmj*. 1997;315(7109):629-634.

9. Easterbrook PJ, Gopalan R, Berlin JA, Matthews DR. Publication bias in clinical research. *The Lancet*. 1991/04/13/ 1991;337(8746):867-872. doi:<https://doi.org/10.1016/0140-6736(91)90201-Y>

10. Borenstein M, Higgins JP. Meta-analysis and subgroups. *Prev Sci*. Apr 2013;14(2):134-43. doi:10.1007/s11121-013-0377-7

11. Joanna Briggs Institute. Checklist for analytical cross sectional studies: Critical appraisal tools for use in JBI Systematic Reviews. 2020.

12. Joanna Briggs Institute. Checklist for case control studies: Critical appraisal tools for use in JBI Systematic Reviews. 2020.

13. Peimani M, Nasli-Esfahani E, Sadeghi R. Patients’ perceptions of patient–provider communication and diabetes care: A systematic review of quantitative and qualitative studies. *Chronic illness*. 2020;16(1):3-22.

14. Bartrim K, McCarthy B, McCartney D, Grant G, Desbrow B, Irwin C. Three consecutive nights of sleep loss: Effects of morning caffeine consumption on subjective sleepiness/alertness, reaction time and simulated driving performance. *Transp Res Part F Traffic Psychol Behav*. 2020;70:124-134. doi:10.1016/j.trf.2020.02.017

15. Caponecchia C, Williamson A. Drowsiness and driving performance on commuter trips. *J Safety Res*. 2018;66:179-186. doi:10.1016/j.jsr.2018.07.003

16. Miyata S, Noda A, Ozaki N, et al. Insufficient sleep impairs driving performance and cognitive function. *Neurosci Lett*. 2010;469(2):229-233. doi:10.1016/j.neulet.2009.12.001

17. Philip P, Sagaspe P, Moore N, et al. Fatigue, sleep restriction and driving performance. *Accid Anal Prev*. 2005;37(3):473-478. doi:10.1016/j.aap.2004.07.007

18. Philip P, Sagaspe P, Taillard J, et al. Fatigue, sleepiness, and performance in simulated versus real driving conditions. *Sleep*. 2005;28(12):1511-1516. doi:10.1093/sleep/28.12.1511

19. Shekari Soleimanloo S, Wilkinson VE, Cori JM, et al. Eye-Blink Parameters Detect On-Road Track-Driving Impairment Following Severe Sleep Deprivation. *J Clin Sleep Med*. 2019;15(9):1271-1284. doi:10.5664/jcsm.7918

20. Shiferaw BA, Downey LA, Westlake J, et al. Stationary gaze entropy predicts lane departure events in sleep-deprived drivers. *Sci Rep*. 2018;8(2220):1-10. doi:10.1038/s41598-018-20588-7

21. Vakulin A, Baulk SD, Catcheside PG, et al. Effects of moderate sleep deprivation and low-dose alcohol on driving simulator performance and perception in young men. *Sleep*. 2007;30(10):1327-1333. doi:10.1093/sleep/30.10.1327

22. Wijayanto T, Marcillia SR, Lufityanto G, Wisnugraha BB, Alma TG, Abdianto RU. The effect of situation awareness on driving performance in young sleep-deprived drivers. *IATSS Res*. 2021;45(2):218-225. doi:10.1016/j.iatssr.2020.10.002

23. Zeller R, Williamson A, Friswell R. The effect of sleep-need and time-on-task on driver fatigue. *Transp Res Part F Traffic Psychol Behav*. 2020;74:15-29. doi:10.1016/j.trf.2020.08.001

24. Akerstedt T, Ingre M, Kecklund G, et al. Reaction of sleepiness indicators to partial sleep deprivation, time of day and time on task in a driving simulator – the DROWSI project. *J Sleep Res*. 2010;19(2):298-309. doi:10.1111/j.1365-2869.2009.00796.x

25. Anderson C, Horne JA. Driving drowsy also worsens driver distraction. *Sleep Med*. 2013;14(5):466-468. doi:10.1016/j.sleep.2012.11.014

26. Barrett PR, Horne JA, Reyner LA. Sleepiness combined with low alcohol intake in women drivers: greater impairment but better perception than men? *Sleep*. 2004;27(6):1057-1062. doi:10.1093/sleep/27.6.1057

27. Cai AWT, Manousakis JE, Singh B, et al. On-road driving impairment following sleep deprivation differs according to age. *Sci Rep*. 2021;11(1):21561. doi:10.1038/s41598-021-99133-y

28. De Valck E, Cluydts R. Slow-release caffeine as a countermeasure to driver sleepiness induced by partial sleep deprivation. *J Sleep Res*. 2001;10(3):203-209. doi:10.1046/j.1365-2869.2001.00260.x

29. Filtness AJ, Reyner LA, Horne JA. Driver sleepiness-Comparisons between young and older men during a monotonous afternoon simulated drive. *Biol Psychol*. 2012;89(3):580-583. doi:10.1016/j.biopsycho.2012.01.002

30. Horne JA, Reyner LA, Barrett PR. Driving impairment due to sleepiness is exacerbated by low alcohol intake. *Occup Environ Med*. 2003;60(9):689-692. doi:10.1136/oem.60.9.689

31. Jongen S, Perrier J, Vuurman EF, Ramaekers JG, Vermeeren A. Sensitivity and validity of psychometric tests for assessing driving impairment: Effects of sleep deprivation. *PLoS One*. 2015;10(2):e0117045. doi:10.1371/journal.pone.0117045

32. Otmani S, Pebayle T, Roge J, Muzet A. Effect of driving duration and partial sleep deprivation on subsequent alertness and performance of car drivers. *Physiol Behav*. 2005;84(5):715-724. doi:10.1016/j.physbeh.2005.02.021

33. Perrier J, Jongen S, Vuurman E, Bocca ML, Ramaekers JG, Vermeeren A. Driving performance and EEG fluctuations during on-the-road driving following sleep deprivation. *Biol Psychol*. 2016;121(Part A):1-11. doi:10.1016/j.biopsycho.2016.09.010

34. Pizza F, Contardi S, Mostacci B, Mondini S, Cirignotta F. A driving simulation task: correlations with Multiple Sleep Latency Test. *Brain Res Bull*. 2004;63(5):423-426. doi:10.1016/j.brainresbull.2003.12.015

35. Hanowski RJ, Hickman J, Fumero MC, Olson RL, Dingus TA. The sleep of commercial vehicle drivers under the 2003 hours-of-service regulations. *Accid Anal Prev*. 2007;39(6):1140-1145. doi:10.1016/j.aap.2007.02.011

36. Liu Y, Guo F, Hanowski RJ. Assessing the impact of sleep time on truck driver performance using a recurrent event model. *Stat Med*. 2019;38(21):4096-4111. doi:10.1002/sim.8287

37. Martiniuk ALC, Senserrick T, Lo S, et al. Sleep-Deprived Young Drivers and the Risk for Crash: The DRIVE Prospective Cohort Study. *JAMA Pediatr*. 2013;167(7):647-655. doi:10.1001/jamapediatrics.2013.1429

38. Smith A, McDonald AD, Sasangohar F. The Impact of Commutes, Work Schedules, and Sleep on Near-Crashes during Nurses’ Post Shift-Work Commutes: A Naturalistic Driving Study. *IISE Trans Occup Ergon Hum Factors*. 2021;9(1):13-22. doi:10.1080/24725838.2021.1945708

39. Cummings P, Koepsell TD, Moffat JM, Rivara FP. Drowsiness, counter-measures to drowsiness, and the risk of a motor vehicle crash. *Inj Prev*. 2001;7(3):194-199. doi:10.1136/ip.7.3.194

40. Connor J, Norton R, Ameratunga S, et al. Driver sleepiness and risk of serious injury to car occupants: population based case control study. *Br Med J*. 2002;324(7346):1125. doi:10.1136/bmj.324.7346.1125

41. Stutts JC, Wilkins JW, Osberg JS, Vaughn BV. Driver risk factors for sleep-related crashes. *Accid Anal Prev*. 2003;35(3):321-331. doi:10.1016/s0001-4575(02)00007-6

42. Dorrian J, Sweeney M, Dawson D. Modeling fatigue-related truck accidents: Prior sleep duration, recency and continuity. *Sleep Biol Rhythms*. 2011;9(1):3-11. doi:10.1111/j.1479-8425.2010.00477.x

43. Bakiri S, Galera C, Lagarde E, et al. Distraction and driving: Results from a case-control responsibility study of traffic crash injured drivers interviewed at the emergency room. *Accid Anal Prev*. 2013;59:588-592. doi:10.1016/j.aap.2013.06.004

44. Galéra C, Orriols L, M'Bailara K, et al. Mind wandering and driving: responsibility case-control study. *Br Med J*. 2012;345:e8105. doi:10.1136/bmj.e8105

45. Stevenson MR, Elkington J, Sharwood L, et al. The Role of Sleepiness, Sleep Disorders, and the Work Environment on Heavy-Vehicle Crashes in 2 Australian States. *Am J Epidemiol*. 2014;179(5):594-601. doi:10.1093/aje/kwt305

46. Herman J, Kafoa B, Wainiqolo I, et al. Driver sleepiness and risk of motor vehicle crash injuries: a population-based case control study in Fiji (TRIP 12). *Injury*. 2014;45(3):586-591. doi:10.1016/j.injury.2013.06.007

47. Philip P, Chaufton C, Orriols L, et al. Complaints of poor sleep and risk of traffic accidents: A population-based case-control study. *PLoS One*. 2014;9(1):e114102. doi:10.1371/journal.pone.0114102

48. Tefft BC. Acute sleep deprivation and culpable motor vehicle crash involvement. *Sleep*. 2018;41(10):1-11. doi:10.1093/sleep/zsy144

49. Kalsi J, Tervo T, Bachour A, Partinen M. Sleep versus non-sleep-related fatal road accidents. *Sleep Med*. 2018;51:148-152. doi:10.1016/j.sleep.2018.04.017

50. Abe T, Komada Y, Inoue Y. Short Sleep Duration, Snoring and Subjective Sleep Insufficiency Are Independent Factors Associated with both Falling Asleep and Feeling Sleepiness while Driving. *Intern Med*. 2012;51(23):3253-3260. doi:10.2169/internalmedicine.51.7518

51. Abe T, Komada Y, Nishida Y, Hayashida K, Inoue Y. Short sleep duration and long spells of driving are associated with the occurrence of Japanese drivers' rear-end collisions and single-car accidents. *J Sleep Res*. 2010;19(2):310-316. doi:10.1111/j.1365-2869.2009.00806.x

52. Abe T, Komada Y, Asaoka S, Ozaki A, Inoue Y. Questionnaire-based evidence of association between sleepiness while driving and motor vehicle crashes that are subjectively not caused by falling asleep. *Sleep Biol Rhythms*. 2011;9(3):134-143. doi:10.1111/j.1479-8425.2011.00498.x

53. AlShareef SM. Excessive daytime sleepiness and associations with sleep-related motor vehicle accidents: results from a nationwide survey. *Sleep Breath*. 2021;25(3):1671-1676. doi:10.1007/s11325-020-02260-5

54. Andreassen CS, Pallesen S, Moen BE, Bjorvatn B, Waage S, Schaufeli WB. Workaholism and negative work-related incidents among nurses. *Ind Health*. 2018;56(5):373-381. doi:10.2486/indhealth.2017-0223

55. Center for Disease Control and Prevention. Unhealthy sleep-related behaviors—12 States, 2009. *Morb Mortal Wkly Rep*. 2011;60(8):233-238.

56. Center for Disease Control and Prevention. Drowsy driving—19 states and the District of Columbia, 2009-2010. *Morb Mortal Wkly Rep*. 2013;61(51-52):1033-1037. doi:10.1001/jama.2013.105

57. Chen YY, Wu KC. Sleep habits and excessive daytime sleepiness correlate with injury risks in the general population in Taiwan. *Inj Prev*. 2010;16(3):172-177. doi:10.1136/ip.2009.021840

58. Di Milia L, Rogers NL, Akerstedt T. Sleepiness, Long Distance Commuting and Night Work as Predictors of Driving Performance. *PLoS One*. 2012;7(9):e45856. doi:10.1371/journal.pone.0045856

59. Elliman TD, Schwalb ME, Adler AB. Sleep deprivation and hazardous unintended sleep in US army drill sergeants. *Sleep Health*. 2020;6(3):350-357. doi:10.1016/j.sleh.2020.04.007

60. Hutchens L, Senserrick TM, Jamieson PE, Romer D, Winston FK. Teen driver crash risk and associations with smoking and drowsy driving. *Accid Anal Prev*. 2008;40(3):869-876. doi:10.1016/j.aap.2007.10.001

61. Ikeda H, Matsumoto S, Kubo T, Izawa S, Takahashi M. Relationship between sleep problems and dangerous driving behaviors in Japanese short-haul commercial truck drivers: a cross-sectional survey using digital tachograph data. *Sleep Biol Rhythms*. 2021;19(3):297-303. doi:10.1007/s41105-021-00318-9

62. Johnson KM, Simon N, Wicks M, Barr K, O'Connor K, Schaad D. Amount of Sleep, Daytime Sleepiness, Hazardous Driving, and Quality of Life of Second Year Medical Students. *Acad Psychiatry*. 2017;41(5):669-673. doi:10.1007/s40596-017-0668-6

63. Kim D, Shin DS, Lee SC, et al. Sleep status and the risk factor of drowsy-related accidents in commercial motor vehicle drivers. *Sleep Med Res*. 2018;9(2):97-103. doi:10.17241/smr.2018.00283

64. Lemke MK, Apostolopoulos Y, Hege A, Sonmez S, Wideman L. Understanding the role of sleep quality and sleep duration in commercial driving safety. *Accid Anal Prev*. 2016;97:79-86. doi:10.1016/j.aap.2016.08.024

65. Mahajan K, Velaga NR, Kumar A, Choudhary P. Effects of driver sleepiness and fatigue on violations among truck drivers in India. *Int J Inj Control Saf Promot*. 2019;26(4):412-422. doi:10.1080/17457300.2019.1660375

66. Mahajan K, Velaga NR, Kumar A, Choudhary A, Choudhary P. Effects of driver work-rest patterns, lifestyle and payment incentives on long-haul truck driver sleepiness. *Transp Res Part F Traffic Psychol Behav*. 2019;60:366-382. doi:10.1016/j.trf.2018.10.028

67. Maia Q, Grandner MA, Findley J, Gurubhagavatula I. Short and long sleep duration and risk of drowsy driving and the role of subjective sleep insufficiency. *Accid Anal Prev*. 2013;59:618-622. doi:10.1016/j.aap.2013.07.028

68. Morrow PC, Crum MR. Antecedents of fatigue, close calls, and crashes among commercial motor-vehicle drivers. *J Safety Res*. 2004;35(1):59-69. doi:10.1016/j.jsr.2003.07.004

69. Ohayon MM, Smolensky MH, Roth T. Consequences of shiftworking on sleep duration, sleepiness, and sleep attacks. *Chronobiol Int*. 2010;27(3):575-589. doi:10.3109/07420521003749956

70. Perttula P, Ojala T, Kuosma E. Factors in the fatigue of heavy vehicle drivers. *Psychol Rep*. 2011;108(2):507-514. doi:10.2466/06.13.22.Pr0.108.2.507-514

71. Quera Salva MA, Barbot F, Hartley S, et al. Sleep disorders, sleepiness, and near-miss accidents among long-distance highway drivers in the summertime. *Sleep Med* 2014;15(1):23-26. doi:10.1016/j.sleep.2013.06.018

72. Radun I, Summala H. Sleep-related fatal vehicle accidents: characteristics of decisions made by multidisciplinary investigation teams. *Sleep* 2004;27(2):224-227. doi:10.1093/sleep/27.2.224

73. Watling CN. Young drivers who continue to drive while sleepy: What are the associated sleep- and driving-related factors? *J Sleep Res*. 2020;29(3):e12900. doi:10.1111/jsr.12900

74. Wu D, Yang TZ, Yang XY, Hoe CH, Peng SH, Yu LW. Behavioral and psychosocial correlates of road traffic injuries: evidence from a nationwide study on Chinese undergraduates. *Traffic Inj Prev*. 2020;21(6):375-381. doi:10.1080/15389588.2020.1770236
